# Supplementary material for: How Advance Sales Can Reduce Profits: When to Buy, When to Sell, and What Price to Charge
Source: Atypon-hosted journal article supplement (doi:10.1287/msom.2023.1218), 2023-05-10
Supplement: msom.2023.1218.sm1.pdf [file msom.2023.1218.sm1.pdf]

# How Advance Sales can Reduce Profits: When to Buy, When to Sell, and What Price to Charge - Online appendix

April 2, 2023

## 1 Proof of Theorem 14

*Proof.* Since subtracting  $p$  from  $v$  is just moving to the left of  $v$ , we will ignore  $p$ . The statement in Theorem 14 becomes

- $(0, 0)$  if  $(v, k)$  is in Region 1.
- $(0, v_1 + k + R(v_1 + k))$  if  $(v, k)$  is in Region 2.
- $(v_1 + R(v_1), W[A] - (1 + \frac{k}{v_1}) R(v_1))$  if  $(v, k)$  is in Region 3.
- $(v_1 + R(v_1), 0)$  if  $(v, k)$  is in Region 4.
- The first statement follows immediately from the definition of Region 1 (see Table 1 in the main text).
- We wish to prove that the equilibrium value of  $\lambda_2$  in Region 2 equals  $v_1 + k + R(v_1 + k)$ . Recall that in Region 2,

$$v_1 + k = \frac{\lambda_2 e^{\lambda_1}}{1 - e^{-\lambda_2}}. \quad (1)$$

Since in Region 2  $\lambda_1 = 0$ , (1) becomes

$$v_1 + k = \frac{\lambda_2}{1 - e^{-\lambda_2}}. \quad (2)$$

First, we show that  $\lambda_2 = v_1 + k + R(v_1 + k)$  indeed solves (2).

Substituting  $\lambda_2 = v_1 + k + R(v_1 + k)$  in the right-hand side of (2) gives

$$\frac{v_1 + k + R(v_1 + k)}{1 - e^{-(v_1 + k)} e^{-R(v_1 + k)}}. \quad (3)$$

By Property W5

$$e^{-R(v_1 + k)} = \frac{R(v_1 + k)}{-(v_1 + k) e^{-(v_1 + k)}}. \quad (4)$$

Substituting this in (3) gives

$$\frac{v_1 + k + R(v_1 + k)}{1 + \frac{R(v_1 + k)}{v_1 + k}} = v_1 + k,$$

which is the left-hand side of (2).

Now, because the right-hand side of (2) is strictly monotonic in  $\lambda_2$ , then for any given pair  $(v_1, k)$  the value  $\lambda_2 = v_1 + k + R(v_1 + k)$  *uniquely* solves (2).

- To find  $\lambda_1$  in Regions 3 and 4 recall that  $u_1 = 0$  there. Thus,

$$v_1 = \frac{\lambda_1}{1 - e^{-\lambda_1}}. \quad (5)$$

Note that substituting  $k = 0$  in (2) and changing  $\lambda_2$  to  $\lambda_1$  yields (5). Hence the proof given earlier for  $\lambda_2$  in Region 2 applies for  $\lambda_1$  in Regions 3 and 4, and gives  $\lambda_1 = v_1 + R(v_1)$ .

- Lastly, we have yet to prove that the equilibrium value of  $\lambda_2$  in Region 3 is  $W[A] - \left(1 + \frac{k}{v_1}\right) R(v_1)$ .

Recall that we consider  $c$  as the unit value. Recall also that  $v_1 = v - p - k$ , and that  $v_2 = v - p$ . Note that given  $v$  and  $k$ , the values  $v_1$  and  $v_2$  are functions of  $p$ . We find that most of the expressions appearing in our analysis are functions of  $v - p - k$ . Thus we focus on  $v_1$ . The four regions in terms of  $v_1$  are

- Region 1 is reached iff  $-k \leq v_1 < 1 - k$ .
- Region 2 is reached iff  $1 - k \leq v_1 \leq 1$ .
- Region 3 is reached iff  $1 < v_1 < v(k) - k$ .
- Region 4 is reached iff  $v(k) - k \leq v_1$ ,

where  $v(k)$  was defined as the point separating Regions 3 and 4 (when the regions were expressed in terms of  $v$ ).

What is left to prove is that the equilibrium value of  $\lambda_2$  in Region 3 is  $W[A] - \left(1 + \frac{k}{v_1}\right) R(v_1)$ .

Recall that  $A = -(v_1 + k)e^{-v_1 + \frac{k}{v_1}R(v_1)}$ .

Using the two central equations  $u_1 = 0$  and  $u_2 = 0$ , that hold in Region 3 (see (4) and (5) in the main paper) we have

$$v_1 = \frac{\lambda_1}{1 - e^{-\lambda_1}}, \quad (6)$$

and

$$v_2 = \frac{\lambda_2 e^{\lambda_1}}{1 - e^{-\lambda_2}}. \quad (7)$$

We already proved that in Regions 3 and 4 the equilibrium value of  $\lambda_1$  is  $v_1 + R(v_1)$ , and that

it uniquely solves (6). Substituting this in (7) gives

$$v_2 = \frac{\lambda_2 e^{v_1 + R(v_1)}}{1 - e^{-\lambda_2}},$$

which is the same as

$$v_2 e^{-v_1 - R(v_1)} = \frac{\lambda_2}{1 - e^{-\lambda_2}}. \quad (8)$$

Since the right-hand side of (8) is monotonic in  $\lambda_2$ , for any given pair  $v_1, v_2$  at most one value of  $\lambda_2$  satisfies (8). We now show that the proposed solution  $\lambda_2 = W[A] - \frac{v_2 R(v_1)}{v_1}$  satisfies (8). Substituting this  $\lambda_2$  in the right-hand side of (8) gives

$$\frac{W[A] - \frac{v_2 R(v_1)}{v_1}}{1 - e^{-\frac{v_2 R(v_1)}{v_1} - W[A]}}.$$

Because of Property W5 this expression equals

$$\frac{W[A] - \frac{v_2 R(v_1)}{v_1}}{1 - \frac{e^{-\frac{v_2 R(v_1)}{v_1}} W[A]}{A}},$$

which equals

$$\frac{\left(W[A] - \frac{v_2 R(v_1)}{v_1}\right) A}{A - e^{-\frac{v_2 R(v_1)}{v_1}} W[A]}.$$

Since  $v_2 = v_1 + k$  the above equals

$$\begin{aligned} & \frac{\left(\frac{v_2 R(v_1)}{v_1} - W[A]\right) v_2 e^{-v_1 + \frac{kR(v_1)}{v_1}}}{-v_2 e^{-v_1 + \frac{kR(v_1)}{v_1}} - e^{-\frac{v_2 R(v_1)}{v_1}} W[A]} \\ &= \frac{\left(\frac{v_2 R(v_1)}{v_1} - W[A]\right) e^{R(v_1) + \frac{kR(v_1)}{v_1}}}{-v_2 e^{-v_1 + \frac{kR(v_1)}{v_1}} - e^{-\frac{v_2 R(v_1)}{v_1}} W[A]} \cdot v_2 e^{-v_1 - R(v_1)} \end{aligned}$$

Hence we need to prove that the quotient above equals 1, namely that

$$\left(\frac{v_2 R(v_1)}{v_1} - W[A]\right) e^{R(v_1) + \frac{kR(v_1)}{v_1}} = -v_2 e^{-v_1 + \frac{kR(v_1)}{v_1}} - e^{-\frac{v_2 R(v_1)}{v_1}} W[A]. \quad (9)$$

Note that the expression  $e^{R(v_1) + \frac{kR(v_1)}{v_1}}$  appearing on the left-hand side satisfies

$$e^{R(v_1) + \frac{kR(v_1)}{v_1}} = e^{\left(\frac{v_1 + k}{v_1}\right) R(v_1)} = e^{\frac{v_2 R(v_1)}{v_1}}.$$

Substituting this in the left-hand side of (9) gives

$$\frac{v_2 R(v_1)}{v_1} e^{\frac{v_2 R(v_1)}{v_1}} - e^{\frac{v_2 R(v_1)}{v_1}} W[A].$$

Hence we only need to prove that

$$\frac{v_2 R(v_1)}{v_1} e^{\frac{v_2 R(v_1)}{v_1}} = -v_2 e^{-v_1 + \frac{k R(v_1)}{v_1}}.$$

This is equivalent to proving that

$$\frac{R(v_1)}{v_1} e^{\frac{v_2 R(v_1)}{v_1} + v_1 - \frac{k R(v_1)}{v_1}} = -1.$$

Note that the left-hand side of the above equation equals

$$\frac{R(v_1)}{v_1} e^{\frac{(v_2 - k) R(v_1)}{v_1} + v_1} = \frac{R(v_1)}{v_1} e^{R(v_1) + v_1}.$$

By (4) the above equals

$$\frac{R(v_1)}{v_1} \frac{(-v_1 e^{-v_1}) e^{v_1}}{R(v_1)} = -1.$$

□

To prove Theorem 1 in the main paper, we first need to establish several results, using the Lambert function  $W[x]$ . The following lemma proves essential properties of the function  $R(v_1)$ .

**Lemma 1.**

- *R1.*  $R(v_1)$  is negative and increasing for all  $v_1 > 1$ .
- *R2.*  $R(1) = -1$ .
- *R3.*  $R(v(k) - k) = \frac{k}{v(k)} - 1$ .
- *R4.*  $R'(v_1) = \frac{-R(v_1)}{R(v_1) + 1} \cdot \frac{v_1 - 1}{v_1}$ .

*Proof.*

1. Since  $-v_1 < -1 < 0$ , then  $-v_1 e^{-v_1} < 0$ . Hence by Properties W1 (that  $W$  is increasing) and W4 (that  $W[0] = 0$ ), we get  $R(v_1) = W[-v_1 e^{-v_1}] < 0$ . Now  $(-v_1 e^{-v_1})' = e^{-v_1} (v_1 - 1) > 0$  (since  $1 < v_1$ ). The Lambert function is increasing and so  $W[-v_1 e^{-v_1}]$  increases with  $v_1$ , proving R1.
2. To prove R2, note that by Property W2  $R(1) = W[-e^{-1}] = -1$ .
3. We wish to prove that  $R(v(k) - k) = \frac{k}{v(k)} - 1$ . Recall that  $v(k)$  satisfies  $k = v(k) - \frac{\ln v(k)}{1 - \frac{1}{v(k)}}$ . Hence  $(k - v(k))(1 - \frac{1}{v(k)}) = -\ln v(k)$ , and so  $k - v(k) = -\ln v(k) + (\frac{k}{v(k)} - 1)$ . Adding

$\ln(k - v(k))$  to both sides of the equation gives

$$(k - v(k)) + \ln(k - v(k)) = \ln\left(\frac{k}{v(k)} - 1\right) + \left(\frac{k}{v(k)} - 1\right).$$

Thus

$$(k - v(k))e^{k-v(k)} = \left(\frac{k}{v(k)} - 1\right)e^{\frac{k}{v(k)}-1}.$$

Applying the Lambert function to both sides of the equation gives

$$W[(k - v(k))e^{k-v(k)}] = W\left[\left(\frac{k}{v(k)} - 1\right)e^{\frac{k}{v(k)}-1}\right]. \quad (10)$$

The left-hand side of (10) is  $R(v(k) - k)$ . Now by W6, since  $\frac{k}{v(k)} - 1 \geq -1$  then

$$W\left[\left(\frac{k}{v(k)} - 1\right)e^{\frac{k}{v(k)}-1}\right] = \frac{k}{v(k)} - 1,$$

proving R3.

4.

$$R'(v_1) = W'[-v_1 e^{-v_1}]e^{-v_1}(v_1 - 1). \quad (11)$$

Hence by Property W3,

$$R'(v_1) = \frac{R(v_1)e^{-v_1}(v_1 - 1)}{-v_1 e^{-v_1}(R(v_1) + 1)} = \frac{-R(v_1)}{R(v_1) + 1} \cdot \frac{v_1 - 1}{v_1},$$

proving R4. □

For the next result we need the following lemma.

**Lemma 2.** *The expression  $v_1 + (v_1 + k)R(v_1)$ , is negative in Region 3.*

*Proof.* Substituting  $v_1 = v(k) - k$ , which is the right end of Region 3, in  $v_1 + (v_1 + k)R(v_1)$ , and recalling that by R3  $R(v(k) - k) = \frac{k}{v(k)} - 1$ , gives 0. Additionally, by R4, the derivative  $1 + R(v_1) + (v_1 + k)R'(v_1)$  of this expression is

$$1 + R(v_1) + \frac{-R(v_1)(v_1 + k)(v_1 - 1)}{v_1(R(v_1) + 1)}.$$

By R1 and R2, in Region 3  $1 + R(v_1) > 0$ , and  $-R(v_1) > 0$ . Hence the derivative is positive and so the expression  $v_1 + (v_1 + k)R(v_1)$  is negative in Region 3. □

Recall that  $A = A(v_1) = -(v_1 + k)e^{-v_1 + \frac{kR(v_1)}{v_1}}$ ,

**Lemma 3.**

1.  $W[A(v(k) - k)] = -1$ .
2.  $A(v_1)$  decreases with  $v_1$  for  $1 < v_1 < v(k) - k$ .

*Proof.*

1. Since  $W[\cdot]$  is strictly monotonic and by Property W2  $W[-e^{-1}] = -1$ , we must prove that  $A(v(k) - k) = -e^{-1}$ . Now

$$A(v(k) - k) = -v(k)e^{k-v(k)+\frac{kR(v(k)-k)}{v(k)-k}}. \quad (12)$$

From R3,  $R(v(k) - k) = \frac{k}{v(k)} - 1$ . Substituting this in the right-hand side of (12) gives

$$-v(k)e^{k-v(k)+\frac{k(k/v(k)-1)}{v(k)-k}} = -v(k)e^{k-v(k)-\frac{k}{v(k)}} = -e^{k-v(k)-\frac{k}{v(k)}+\ln v(k)},$$

Substituting  $\ln v(k) = -(k - v(k))\left(1 - \frac{1}{v(k)}\right)$  gives

$$-e^{k-v(k)-\frac{k}{v(k)}-(k-v(k))\left(1-\frac{1}{v(k)}\right)} = -e^{-1}.$$

2. To prove that  $A(v_1)$  is decreasing note that

$$A'(v_1) = \frac{e^{-v_1+\frac{kR}{v_1}}\left(v_1(v_1+k-1)+kR\right)\left(v_1+(v_1+k)R\right)}{v_1^2(R+1)}, \quad (13)$$

where  $R = R(v_1)$ . By properties R1 and R2, the denominator is positive. Thus we need to prove that the numerator is negative. In Region 3,  $v_1 > 1$ . Thus by properties R1 and R2,  $v_1 + R > 1 + R > 0$ . Hence the expression in the first parentheses of (13),  $v_1(v_1 + k - 1) + kR$  which equals  $k(v_1 + R) + v_1(v_1 - 1)$ , is positive. The expression in the second parentheses is negative by Lemma 2. Thus,  $A'(v_1)$  is negative implying that  $A(v_1)$  is indeed decreasing there. □

Recall that  $R = R(v_1)$ , and that  $v(k)$  is defined by the equation  $k = v(k) - \frac{\ln v(k)}{1 - \frac{1}{v(k)}}$ . We examine  $W[A]$  as a function of  $k$ . Given  $v_1$  denote by  $k_0$  the value of  $k$  that satisfies  $v_1 = v(k_0) - k_0$ . Denote  $u_0 = v(k_0)$ . Also denote by  $A_0$  the value of  $A$  that corresponds to  $k_0$ , namely  $A_0 = -(v_1 + k_0)e^{-v_1 + \frac{k_0 R}{v_1}}$ .

**Lemma 4.** *Given  $v_1$  :*

1. *In Region 3  $W[A]$  increases with  $k$ .*
2. *In Region 3  $\frac{d}{dk}W[A]$  decreases with  $k$ .*

$$3. \left. \frac{d}{dk} W[A] \right|_{k=k_0} = \frac{1}{u_0}.$$

*Proof.*

1. To prove that  $W[A]$  increases with  $k$  in Region 3 note that

$$\frac{dA}{dk} = -\frac{e^{-v_1 + \frac{kR}{v_1}}}{v_1} (v_1 + (v_1 + k)R).$$

By Lemma 2,  $v_1 + (v_1 + k)R < 0$  in Region 3. Thus  $\frac{dA}{dk} > 0$  and  $A$  increase with  $k$  in Region 3. Since  $W$  is an increasing function,  $W[A]$  also increases with  $k$  in Region 3.

2. Using Property W3 yields

$$\frac{d}{dk} W[A] = \frac{(v_1 + (v_1 + k)R)W[A]}{v_1(v_1 + k)(W[A] + 1)}. \quad (14)$$

The above equals

$$\frac{v_1 + (v_1 + k)R}{v_1(v_1 + k)} - \frac{(v_1 + (v_1 + k)R)}{v_1(v_1 + k)(W[A] + 1)}.$$

Differentiating the above expression with respect to  $k$  gives

$$\frac{d^2}{dk^2} W[A] = \frac{-v_1^2}{(v_1(v_1 + k))^2} + \frac{v_1(v_1 + k) \frac{d}{dk} W[A] (v_1 + (v_1 + k)R)}{(v_1(v_1 + k)(W[A] + 1))^2}. \quad (15)$$

The first term in (15) is negative. The second term is also negative since we proved in Part 1 that  $\frac{d}{dk} W[A]$  is positive, and by Lemma 2 that  $v_1 + (v_1 + k)R$  is negative.

3. By (14)

$$\frac{d}{dk} W[A] = \frac{(v_1 + (v_1 + k)R)W[A]}{v_1(v_1 + k)(W[A] + 1)}.$$

Note that for  $k = k_0$  the numerator vanishes according to Lemma 2, and the denominator vanishes according to Part 1 of Lemma 3.

By L'Hôpital's rule

$$\left. \frac{d}{dk} W[A] \right|_{k=k_0} = \frac{\left. \frac{d}{dk} \left( (v_1 + (v_1 + k)R)W[A] \right) \right|_{k=k_0}}{\left. \frac{d}{dk} \left( v_1(v_1 + k)(W[A] + 1) \right) \right|_{k=k_0}}.$$

Hence

$$\left. \frac{d}{dk} W[A] \right|_{k=k_0} = \frac{RW[A_0] + (v_1 + (v_1 + k_0)R) \left. \frac{d}{dk} W[A] \right|_{k=k_0}}{v_1(W[A_0] + 1) + v_1(v_1 + k_0) \left. \frac{d}{dk} W[A] \right|_{k=k_0}}. \quad (16)$$

Denote  $s = \left. \frac{d}{dk} W[A] \right|_{k=k_0}$ . Then (16) becomes

$$s = \frac{RW[A_0] + (v_1 + (v_1 + k_0)R)s}{v_1(W[A_0] + 1) + v_1(v_1 + k_0)s}.$$

Recalling that  $v_1 + (v_1 + k_0)R$  appearing in the numerator equals 0, and that  $W[A_0] = -1$  yields

$$s = \frac{-R}{v_1(v_1 + k_0)s}. \quad (17)$$

Note that  $s = 0$  does not solve (17); hence the above expression is well defined. From (17) we get

$$s^2 = \frac{-R}{v_1(v_1 + k_0)}. \quad (18)$$

By R3,  $R = R(v_1) = R(u_0 - k_0) = \frac{k_0}{u_0} - 1$ . Substituting this and also  $v_1 = u_0 - k_0$  in (18) gives

$$s^2 = \frac{1 - \frac{k_0}{u_0}}{(u_0 - k_0)u_0} = \frac{u_0 - k_0}{(u_0 - k_0)u_0^2} = \frac{1}{u_0^2}. \quad (19)$$

Now, from the proof of the first part of Lemma 4 (that in Region 3  $W[A]$  increases with  $k$ ), in Region 3  $\frac{d}{dk} W[A]$  is non-negative. In particular,  $s \geq 0$ . Combining this with the fact that  $s \neq 0$ , which we established earlier, gives  $s > 0$ . This, together with (19), implies that  $s = \frac{1}{u_0}$ . □

We can now prove Theorem 1 (see proof in the main paper).

## 1.1 Profit maximization - elaborating on the results in the main paper Section 5.2

The first step is to find an explicit expression for the local maximum of  $\pi$  in each region. However, these local maxima may appear outside the region in which they are valid; in that case they are irrelevant. In other words, the prices  $p$  that are relevant candidates for the global maximum  $\pi$  are the maxima for which  $(v - p, k)$  still lies in the original region of  $(v, k)$ . For instance, if  $(v, k)$  lies in Region 4, then the local maximum for Region 4 may have  $(v - p, k)$  lie in Region 3. That local maximum is not relevant, since in Region 3 there is a different expression for the local maximum of  $\pi$ . For a region with no relevant local maximum we need to check its end points. Among these candidates, the  $p$  that attains the maximum value for  $\pi(p)$  is the price that maximizes the seller's expected profit.

### 1.1.1 Proof of Theorem 4

Recall that the right end of Region 3 was denoted as  $p_3$ . Then  $p_3 = v - k - 1$ . Recall that  $p_2$  and  $p_4$  denote the local maxima of Regions 2 and 4 respectively. Then  $p_2, p_3$ , and  $p_4$  are the only candidates for the global maximum  $p^*$  of the expected profit  $\pi$ . Recall that if  $p_2$  does not belong

to Region 2 it is irrelevant. Similarly for  $p_4$  and Region 4. In contrast,  $p_3 = v - k - 1$ , which is the point separating between Regions 2 and 3, always exists (when Region 3 exists). In order to prove Theorem 4, we wish to find explicit expressions for  $p_i$  and  $\pi_i$  in each region. Denote  $\pi_i = \pi(p_i)$  for  $i = 2, 3, 4$ .

**Definition 5.**

$$W = W[-(k+1)e^{-(k+1)}].$$

**Proposition 6.** *The candidates  $p_2, p_4$  and  $p$ , for the global maxima  $p^*$  of the expected profit  $\pi$  and their associated expected profits  $\pi_i$  are*

1.

$$p_2 = v - \frac{\ln(v)}{1 - \frac{1}{v}}, \quad \pi_2 = v - 1 - \ln(v). \quad (20)$$

2.

$$p_3 = v - k - 1, \quad \pi_3 = (v - k - 1) \left(1 - e^{-(W+k+1)}\right). \quad (21)$$

3.

$$p_4 = v - k - \frac{\ln(v-k)}{1 - \frac{1}{v-k}}, \quad \pi_4 = v - k - 1 - \ln(v-k), \quad (22)$$

*Proof.*

1. Recall that in Region 2,  $\lambda_1 = 0$ . Hence  $(v-p)\frac{1-e^{-\lambda_2}}{\lambda_2} = 1$ , and so in particular,

$$p_2 = v - \frac{\lambda_2}{1 - e^{-\lambda_2}}. \quad (23)$$

Substituting this in  $\pi = p(1 - e^{-(\lambda_1+\lambda_2)})$ , gives

$$\pi_2 = \left(v - \frac{\lambda_2}{1 - e^{-\lambda_2}}\right) \left(1 - e^{-\lambda_2}\right) = v(1 - e^{-\lambda_2}) - \lambda_2. \quad (24)$$

To find the local maximum in Region 2 compute

$$\frac{d}{d\lambda_2}\pi = ve^{-\lambda_2} - 1. \quad (25)$$

The unique solution for  $\frac{d}{d\lambda_2}\pi = 0$  is  $\lambda_2^* = \ln v$ . Substituting this in (23) and (24) gives  $p_2$  and  $\pi_2$ , as stated in (20).

2. Because  $p_3 = v - k - 1$  is on the border between Regions 2 and 3,  $\lambda_1 = 0$ , and so

$$\pi_3 = (v - k - 1) \left(1 - e^{-\lambda_2}\right). \quad (26)$$

Now,  $p = v - k - 1$  implies that  $v_1 = 1$ . Hence, by Theorem 14, in Region 3

$$\lambda_2 = W[A] - (k+1)R(1).$$

By Property W2,  $R(1) = W[-e^{-1}] = -1$ . Note also that by Definition, for  $v_1 = 1$ ,

$$A = -(k+1)e^{-(k+1)}.$$

Hence

$$\lambda_2 = W[-(k+1)e^{-(k+1)}] - (k+1)(-1) = W + k + 1.$$

Substituting  $\lambda_2 = W + k + 1$  in (26) gives (21).

3. Recall that in Region 4,  $\lambda_2 = 0$ . Hence,

$$p_4 = v - k - \frac{\lambda_1}{1 - e^{-\lambda_1}}. \quad (27)$$

So,

$$\pi_4 = (v - k)(1 - e^{-\lambda_1}) - \lambda_1. \quad (28)$$

Now,

$$\frac{d}{d\lambda_1}\pi = (v - k)e^{-\lambda_1} - 1, \quad (29)$$

giving the profit-maximizing value  $\lambda_1^* = \ln(v - k)$ . Substituting this in (27) and (28), gives  $p_4$  and  $\pi_4$ , as stated in (22).

□

**Proposition 7.** For all  $k > 0$ , and  $v > 1$ ,

1.  $\pi_4 < \pi_2$
2.  $\pi_3 < \pi_2$ ,

Proposition 7 is important since it implies that whenever  $p_2 \in \text{Region 2}$  (namely, the local maximum of Region 2 still lies in Region 2) then the global maximum  $\pi^*$  is attained at  $p_2$ , and so  $\pi^* = \pi_2$ .

*Proof.*

1. By (22),  $\pi_4 = v - k - 1 - \ln(v - k)$ , and by (20),  $\pi_2 = v - 1 - \ln(v)$ . Note that for  $y \geq 1$ , the value of  $y - 1 - \ln y$  is increasing. This result and the inequalities  $1 \leq v - k < v$  imply that  $\pi_4 < \pi_2$ .
2. To prove that  $\pi_3 < \pi_2$  for  $k > 0$  we must prove that

$$(v - k - 1) \left(1 - e^{-(W+k+1)}\right) \leq v - 1 - \ln v,$$

which is equivalent to proving that

$$(v - k - 1) \left(1 - e^{-(W+k+1)}\right) - v + \ln v \leq -1. \quad (30)$$

We will find the maximum value of the left-hand side of (30) and show that it equals  $-1$ . To find the maximum we solve

$$\left((v - k - 1) \left(1 - e^{-(W+k+1)}\right) - v + \ln v\right)' = 1 - e^{-W-k-1} - 1 + \frac{1}{v} = 0.$$

The solution is  $v = e^{W+k+1}$ . The second derivative of the left-hand side of (30) is  $(1 - e^{-W-k-1} - 1 + \frac{1}{v})' = -\frac{1}{v^2}$ . Hence  $e^{W+k+1}$  is a local maximum. Note that

$$e^{W+k+1} = e^W e^{k+1} = \frac{-(k+1)e^{-k-1}e^{k+1}}{W} = \frac{k+1}{-W}. \quad (31)$$

We now show that for  $v = e^{W+k+1}$  the left-hand side of (30) is  $-1$ . By Property W5 we obtain

$$\begin{aligned} &= \left(-\frac{k+1}{W} - k - 1\right) \left(1 + \frac{W e^{-(k+1)}}{(k+1)e^{-(k+1)}}\right) + \frac{k+1}{W} + \ln\left(\frac{k+1}{-W}\right) \\ &= \left(-\frac{k+1}{W} - k - 1\right) \left(1 + \frac{W}{k+1}\right) + \frac{k+1}{W} + \ln\left(\frac{k+1}{-W}\right), \end{aligned}$$

which gives

$$-k - 2 - W + \ln\left(-\frac{k+1}{W}\right). \quad (32)$$

Since by (31)  $\frac{k+1}{-W} = e^{W+k+1}$

$$\ln\left(\frac{k+1}{-W}\right) = \ln e^{(W+k+1)} = W + k + 1.$$

Substituting this in (32) gives

$$-k - 2 - W + \ln\left(\frac{k+1}{-W}\right) = -k - 2 - W + W + k + 1 = -1.$$

□

### When does $p_2$ belong to Region 2?

As explained earlier, Proposition 7 implies that whenever  $p_2 \in \text{Region 2}$  (namely, the local maximum of Region 2 still lies in Region 2), then the global maximum  $\pi^*$  is attained at  $p_2$ . We now find the conditions guaranteeing that  $p_2$  lies in Region 2. Recall that  $W = W[-(k+1)e^{-(k+1)}]$ .

**Lemma 8.** *If  $1 \leq v \leq e^{W+k+1}$ , then  $p_2$  lies in Region 2.*

*Proof.* We will first prove that  $p_2$  lies in Region 2, iff  $\frac{\ln v}{1-\frac{1}{v}} \leq k+1$ . Then, we will prove that  $\frac{\ln v}{1-\frac{1}{v}} \leq k+1$  iff  $v \leq e^{W+k+1}$ . Recall that Region 2 refers to all  $p$  satisfying  $v-k-1 \leq p \leq v-1$ . First, by L'Hôpital's rule

$$\lim_{v \rightarrow 1} \frac{\ln v}{1-\frac{1}{v}} = \frac{\lim_{v \rightarrow 1} \frac{1}{v}}{\lim_{v \rightarrow 1} \frac{1}{v^2}} = \frac{1}{1} = 1.$$

Because  $\frac{\ln v}{1-\frac{1}{v}}$  is increasing for all  $v \geq 1$ ,

$$\frac{\ln v}{1-\frac{1}{v}} \geq 1,$$

and so

$$v - \frac{\ln v}{1-\frac{1}{v}} \leq v-1,$$

proving that  $p_2 \leq v-1$ . We now prove that  $p_2 \geq v-k-1$ , iff  $\frac{\ln v}{1-\frac{1}{v}} \leq k+1$ . The latter is equivalent to

$$v - \frac{\ln v}{1-\frac{1}{v}} \geq v-k-1.$$

Hence in this case  $p_2 \geq v-k-1$ , and so  $p_2$  lies in Region 2. We will show that the unique solution for

$$\frac{\ln v}{1-\frac{1}{v}} = k+1 \tag{33}$$

is  $e^{W+k+1}$ . By (31)

$$e^{W+k+1} = -\frac{k+1}{W}.$$

Hence

$$We^{W+k+1} = -(k+1),$$

implying that

$$(W+k+1)e^{W+k+1} - (k+1)e^{W+k+1} = -(k+1),$$

and so

$$(W+k+1)e^{W+k+1} = (k+1)(e^{W+k+1} - 1).$$

This is equivalent to

$$\frac{(W+k+1)e^{W+k+1}}{e^{W+k+1} - 1} = k+1,$$

which implies

$$\frac{W+k+1}{1-\frac{1}{e^{W+k+1}}} = k+1.$$

Hence  $e^{W+k+1}$  solves (33). Because the left-hand side of (33) is strictly increasing,  $e^{W+k+1}$  uniquely solves (33).  $\square$

**Corollary 9.** *If  $1 \leq v \leq e^{W+k+1}$ , then  $p^* = p_2 = v - \frac{\ln(v)}{1-\frac{1}{v}}$ , and  $\pi^* = \pi_2 = v - 1 - \ln(v)$ .*

For larger  $v$ , namely  $v \geq e^{W+k+1}$ , we need to find where  $\pi_3 \geq \pi_4$  is satisfied. In that case,  $p^* = p_3$ . Recall that  $p_3 = v - k + 1$  is the point that separates Regions 2 and 3. Therefore it always exists and is relevant. But  $p_4$ , which is the local maximum of the expression for  $\pi$  in Region 4, may not belong to Region 4, and in that case it is not relevant.

Recall that  $\pi_4 = v - k - 1 - \ln(v - k)$ , and that  $\pi_3 = (v - k - 1)(1 - e^{-(W+k+1)})$ .

Let  $f(v) = \pi_4 - \pi_3$ . Hence,

**Definition 10.**  $f(v) \equiv \left(1 - \frac{v}{k+1}\right)W - \ln(v - k)$ .

Also, denote  $v_m$  as the minimum of  $f$  in Region 3.

**Lemma 11.** *Given  $k$ ,  $f(v)$  is a strictly convex function which has exactly two roots, the smaller of which is  $k + 1$ .*

*Proof.* First, note that  $f(k + 1) = 0$ . Now,

$$f'(v) = \left( \left(1 - \frac{v}{k+1}\right)W - \ln(v - k) \right)' = -\frac{W}{k+1} - \frac{1}{v-k}, \quad (34)$$

and we have

$$f''(v) = \frac{1}{(v-k)^2} > 0.$$

Hence  $f$  is indeed strictly concave, and so has at most two roots. To see that  $k + 1$  is not the only root, we need to find  $v_m$ , the minimum of  $f$  in Region 3, and show that  $k + 1 \neq v_m$ . To solve  $f'(v) = 0$ , we use (34) obtaining

$$-\frac{W}{k+1} - \frac{1}{v-k} = 0.$$

This is equivalent to

$$v - k = -\frac{k+1}{W}.$$

Hence

$$v = k - \frac{k+1}{W},$$

and so  $v_m = k - \frac{k+1}{W}$  is the minimum of  $f$  in Region 3. We now show that  $k + 1 < v_m$ . Since  $-(k+1)e^{-(k+1)} \geq -e^{-1}$  for all  $k > 0$ , and  $W[\cdot]$  is an increasing function, then  $W = W[-(k+1)e^{-(k+1)}] \geq W[-e^{-1}] = -1$ . Thus for all  $k > 0$ ,  $W > -(k+1)$  and so

$$1 < -\frac{k+1}{W},$$

and

$$k + 1 < k - \frac{k+1}{W} = v_m.$$

Hence  $f$  has exactly two roots.

The function  $f$  is strictly convex, and  $f(v_m) < 0$  (since  $f(k+1) = 0$ , and  $v_m$  is the minimum of  $f$ ). Therefore  $v_m$  lies between the two roots. Because  $k + 1 < v_m$ ,  $k + 1$  is the smaller root. Denote

$v_f$  as the larger root (a formal definition is presented after the end of the proof). Then

$$k + 1 < v_m \leq v_f. \quad (35)$$

□

**Definition 12.**  $v_f$  is the unique value that satisfies both  $f(v) = 0$ , and  $v > k + 1$ .

Because of Lemma 11,  $v_f$  is well defined. See Figure 1 that presents  $f$  as a function of  $v$  for  $k = 1$ .

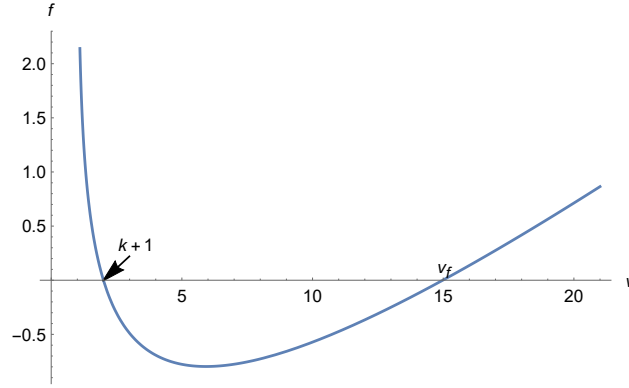

Figure 1:  $f$  as a function of  $v$

Since  $f(v) = \pi_4 - \pi_3$ , it follows that for all  $v$  satisfying  $k + 1 < v < v_f$   $\pi_4 < \pi_3$ . Recall that by Proposition 7  $\pi_3 \leq \pi_2$ , and that by Lemma 8  $p_2$  is relevant for all  $v$  satisfying  $1 \leq v \leq e^{W+k+1}$ .

**Corollary 13.** For every pair  $(v, k)$

$$e^{W+k+1} \leq v_f.$$

*Proof.* Recall that by (31) we have

$$e^{W+k+1} = -\frac{k+1}{W}.$$

Thus

$$e^{W+k+1} = -\frac{k+1}{W} \leq k - \frac{k+1}{W} = v_m \leq v_f,$$

where the last inequality follows from (35). □

**Corollary 14.**

- For all  $1 \leq v \leq e^{W+k+1}$ ,  $p^* = p_2$ , and  $\pi^* = \pi_2$ .
- For all  $e^{W+k+1} < v \leq v_f$ ,  $p^* = p_3$ , and  $\pi^* = \pi_3$ .

But what happens for  $v > v_f$ ? By Lemma 11  $\pi_4 > \pi_3$  for  $v > v_f$ . But is  $p_4$  relevant (i.e., does it belong to Region 4) for  $v > v_f$ ? The following Lemma says Yes.

**Lemma 15.**

1. If  $v \geq k + v(k)$  then  $p_4$  lies in Region 4.
2. For every pair  $(v, k)$   $v_f \geq k + v(k)$ .

*Proof.*

1. Recall that Region 4 refers to all  $p$  satisfying  $0 \leq p \leq v - v(k)$ .

Proving that  $p_4 \geq 0$  requires proving that

$$v - k - \frac{\ln(v - k)}{1 - \frac{1}{v - k}} \geq 0.$$

This is equivalent to

$$(v - k) \left( 1 - \frac{1}{v - k} \right) - \ln(v - k) \geq 0.$$

Hence we need to prove that

$$(v - k) - \ln(v - k) \geq 1. \tag{36}$$

Note that  $v - k \geq v(k) \geq 1$  (where the last inequality follows from the fact that for all  $k \geq 0$   $v(k) \geq 1$ .) For  $v - k \geq 1$  (36) always holds since the left-hand side of (36) equals 1 for  $v - k = 1$  and is increasing for  $v - k \geq 1$ . Hence  $p_4$  is indeed non-negative. We now prove that  $p_4 \leq v - v(k)$  if  $v \geq k + v(k)$ . Since  $\frac{\ln y}{1 - \frac{1}{y}}$  increases with  $y$ ,  $v - k \geq v(k)$  implies that

$$\frac{\ln(v - k)}{1 - \frac{1}{v - k}} \geq \frac{\ln v(k)}{1 - \frac{1}{v(k)}}.$$

Hence

$$v - k - \frac{\ln(v - k)}{1 - \frac{1}{v - k}} \leq v - k - \frac{\ln v(k)}{1 - \frac{1}{v(k)}}.$$

The left-hand side of the above equals  $p_4$ , so we have

$$p_4 \leq v - k - \frac{\ln v(k)}{1 - \frac{1}{v(k)}}.$$

Recall that  $v(k) = k + \frac{\ln v(k)}{1 - \frac{1}{v(k)}}$ , so that  $p_4 \leq v - v(k)$ .

2. We will prove that  $k + v(k) \leq v_m$ , where  $v_m$  was defined as the minimum of  $f$ . This result and the observation that  $v_m \leq v_f$  (see (35) in the proof of Lemma 11) complete the proof. Recall that

$$v_m = k - \frac{(k + 1)}{W}.$$

Hence we need to prove that

$$v(k) \leq -\frac{(k + 1)}{W}.$$

By (31)

$$-\frac{(k+1)}{W} = e^{W+k+1},$$

so we must prove that

$$v(k) \leq e^{W+k+1}.$$

Both sides of the inequality are functions of  $k$ . For  $k = 0$ , we obtain equality with 1 on both sides. As seen in Figure 2 from then on  $v(k) < e^{W+k+1}$ .

□

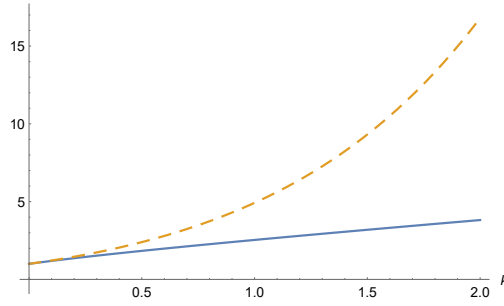

Figure 2:  $v(k)$  (solid line) and  $e^{W+k+1}$  (dashed line) as functions of  $k$

The proof of Theorem 4 follows immediately from the results in this section. Note that if  $k$  is sufficiently large then the condition  $1 \leq v \leq e^{W+k+1}$  (appearing in case 2 of Theorem 4) is indeed satisfied and the upper bound  $v - 1 - \ln v$  of  $\pi$  is thus obtained. Therefore the profit-maximizing penalty  $k$  should be large enough to satisfy the condition.

### 1.1.2 Proof of Corollary 5

According to Proposition 7 and Theorem 4, for all  $(v, k)$  the upper bound of  $\pi$  is  $v - 1 - \ln v$ . This upper bound is realized only when  $1 \leq v \leq e^{W+k+1}$  (see case 2 in Theorem 4). In that case  $\pi^* = \pi_2 = v - 1 - \ln v$ , and all consumers arrivals are in period 2. If  $(v, k)$  does not satisfy this condition, then the firm's expected profit will be strictly smaller than  $v - 1 - \ln v$  (since according to Proposition 7  $\pi_2 > \pi_3, \pi_4$ ).
